# Supplementary material for: Tumor cell capture from blood by flowing across antibody-coated surfaces
Source: Royal Society of Chemistry journal article supplement (doi:10.1039/c8lc01158c), 2019-01-01
Supplement: c8lc01158c2.pdf [file c8lc01158c2.pdf]

# Electronic Supplementary Information (ESI)

*S1: List of flow rates and corresponding velocities used in the flow experiments.*

| <b>Flow (<math>\mu\text{L}/\text{min}</math>)</b> | <b>Velocity (mm/sec)</b> |
|---------------------------------------------------|--------------------------|
| <b>1</b>                                          | 0.08                     |
| <b>2</b>                                          | 0.16                     |
| <b>3</b>                                          | 0.24                     |
| <b>4</b>                                          | 0.32                     |
| <b>5</b>                                          | 0.4                      |
| <b>6</b>                                          | 0.48                     |
| <b>7</b>                                          | 0.56                     |
| <b>8</b>                                          | 0.64                     |
| <b>9</b>                                          | 0.72                     |
| <b>10</b>                                         | 0.8                      |
| <b>11</b>                                         | 1                        |
| <b>50</b>                                         | 4                        |
| <b>100</b>                                        | 8                        |
| <b>200</b>                                        | 16                       |
| <b>250</b>                                        | 20                       |
| <b>300</b>                                        | 24                       |

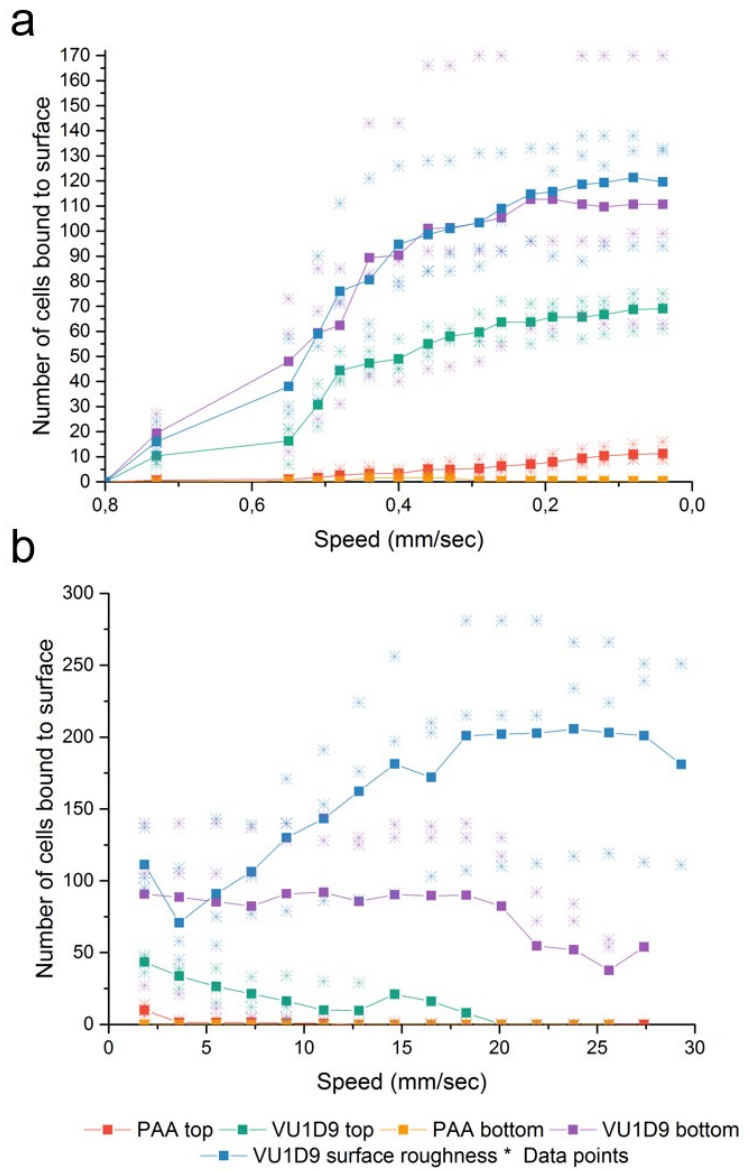

S2: Data of individual attachment and detachment experiments using various functionalized surfaces shown as party transparent data point. Dots connected by continues line represents the mean.

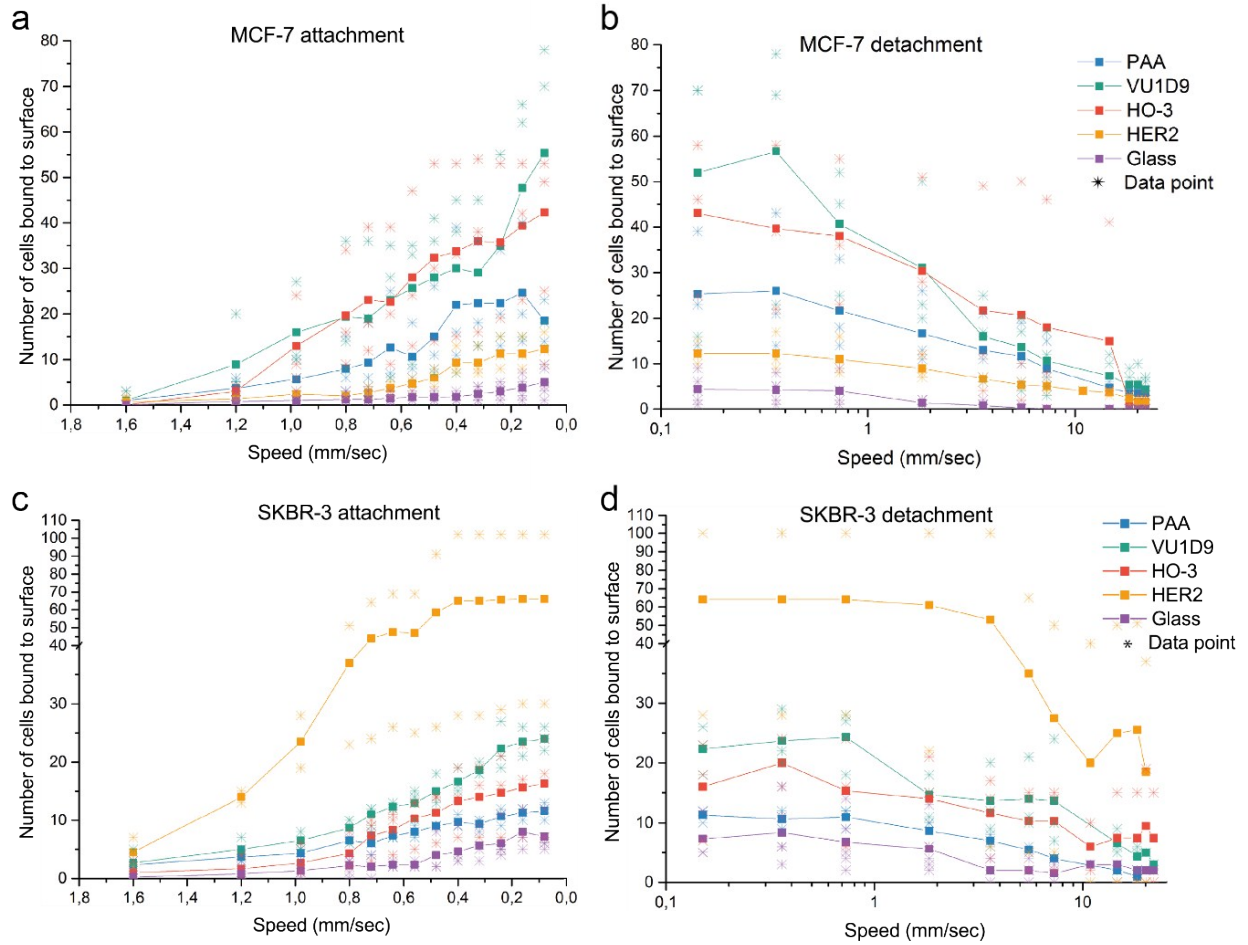

S3: Data points of individual measurements and the mean of each of the different antibodies used for functionalization.

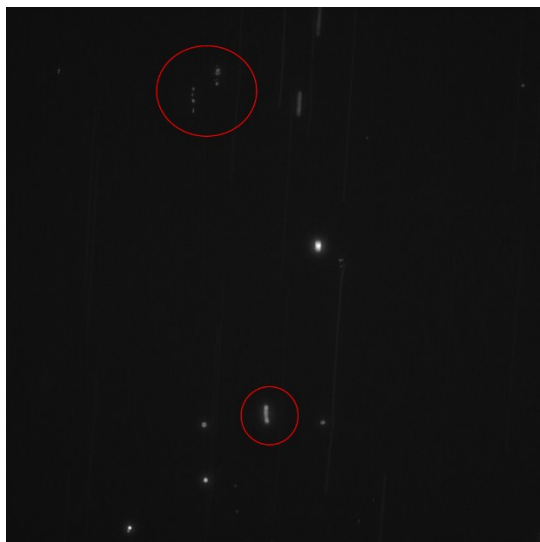

S4: example of cells being sheared apart because of high velocity, red circles indicate cells attached to chip surface being dragged apart because of shear stress of high flow speed.

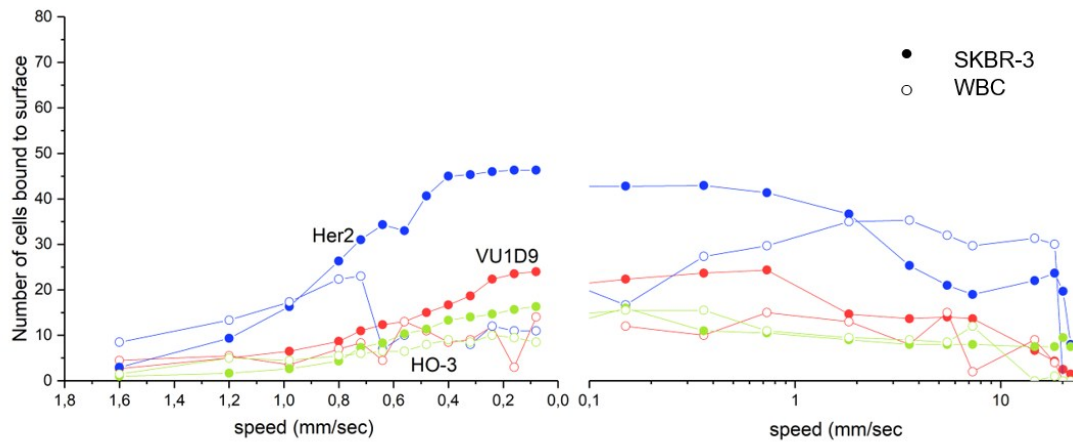

S5: Number of SKBR-3 cells and white blood cells bound to Her-2, HO-3 and VU1D9 coated surfaces
